# Supplementary material for: Quantitative T1 mapping of the normal brain from early infancy to adulthood
Source: Springer Nature journal article supplement (doi:10.1007/s00247-020-04842-7), 2020-10-17

# Frontal white matter

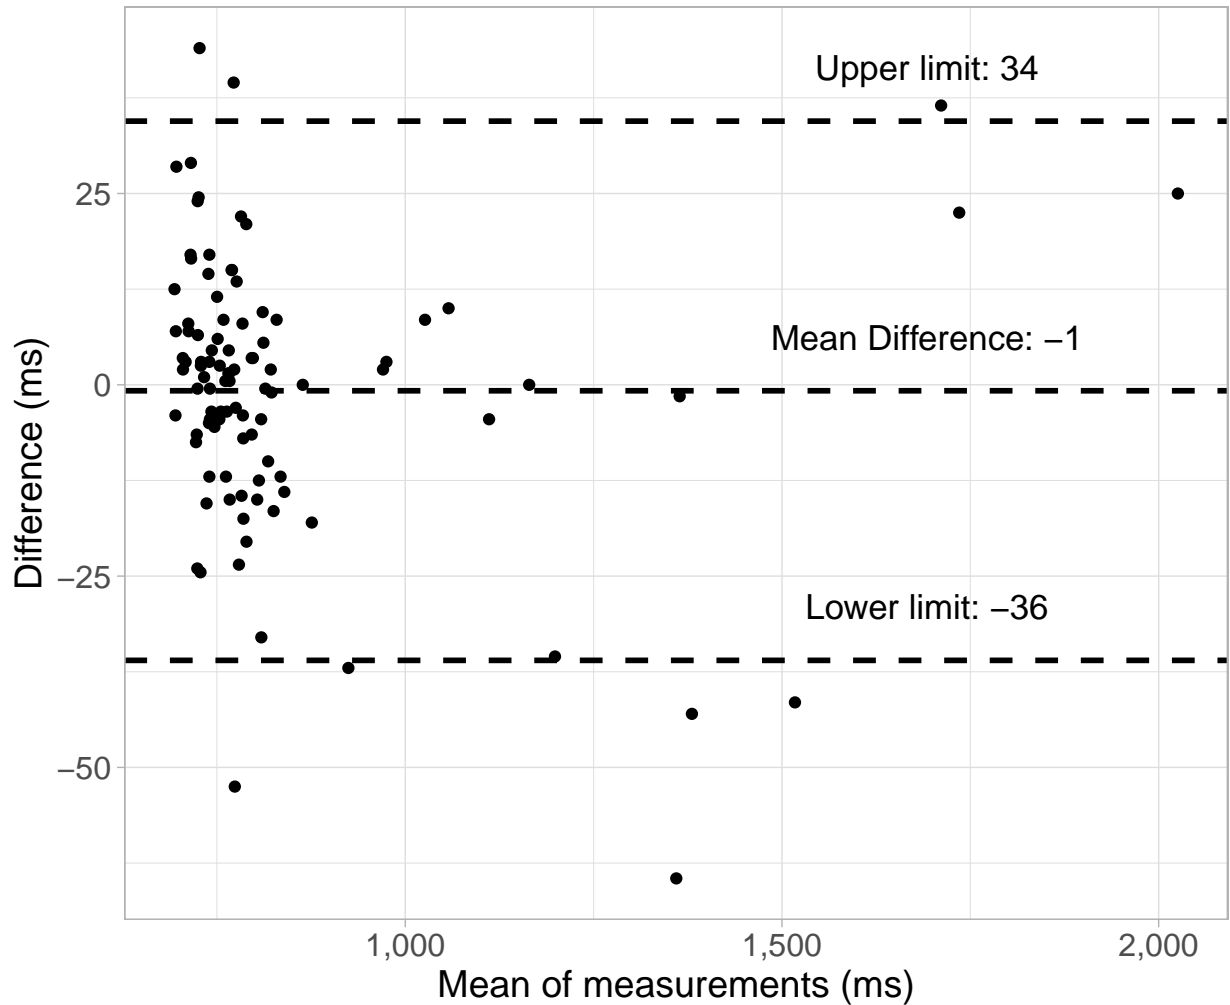

Supplement: MOESM1 [file 18494668]
